# Supplementary material for: Photochromic Langmuir–Blodgett films based on polyoxomolybdate and gemini amphiphiles
Source: Royal Society of Chemistry journal article supplement (doi:10.1039/b716238c), 2008-01-01
Supplement: b716238c.pdf [file b716238c.pdf]

## Photochromic Langmuir-Blodgett Films Based on Polyoxomolybdate and Gemini Amphiphiles

Min Jiang, Tifeng Jiao and Minghua Liu\*

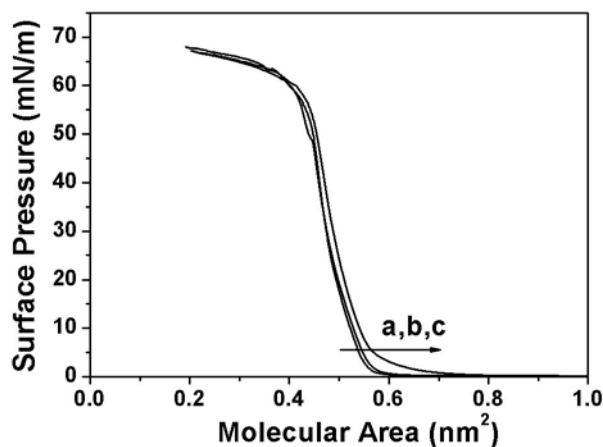

Figure S1.  $\pi$ -A isotherms of gemini amphiphiles (a) BisBC18N1, (b) BisBC18N2, (c) BisBC18N3 on the subphase of pure water.

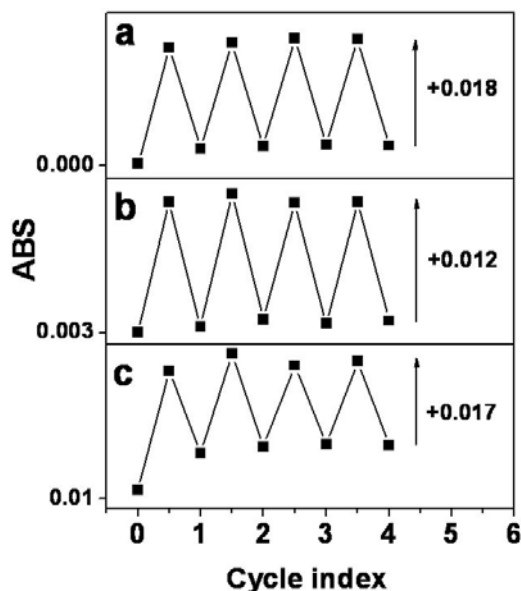

Figure S2. The coloration-decolouration cycles of the films (a) BisBC18N1/PMo<sub>12</sub>, (b) BisBC18N2/PMo<sub>12</sub>, (c) BisBC18N3/PMo<sub>12</sub> at 700 nm.

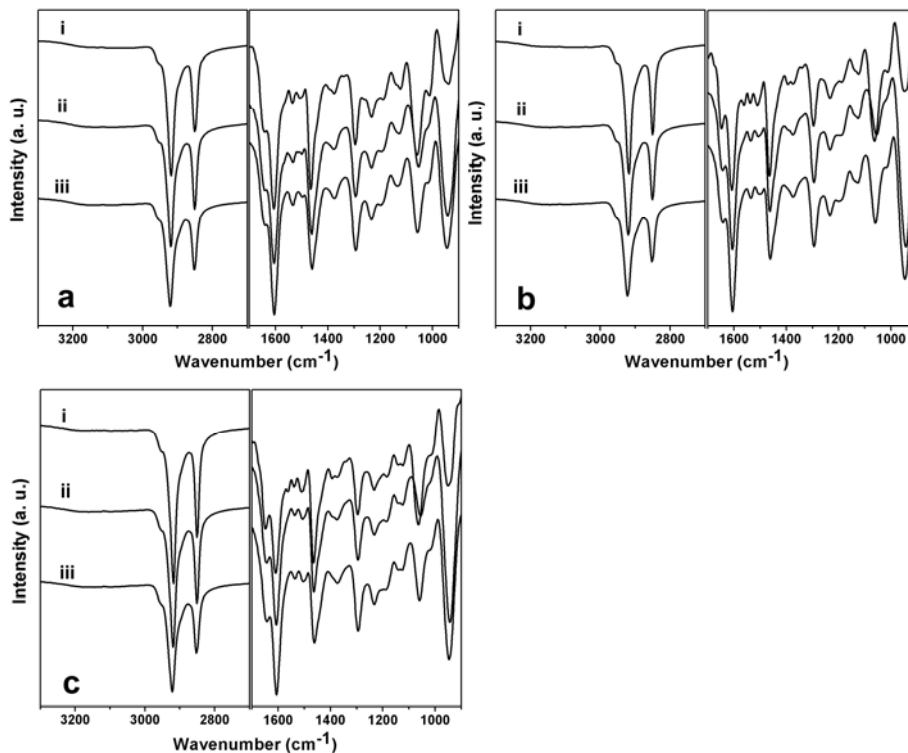

Figure S3. FT-IR spectra of (a) BisBC18N1/PMo<sub>12</sub>, (b) BisBC18N2/PMo<sub>12</sub> and (c) BisBC18N3/PMo<sub>12</sub> multilayer film. The curves i, ii and iii are the spectra of the corresponding film before irradiation, after irradiation and after heating, respectively.
